# Supplementary material for: Methods for detecting channel bed surface changes in a mountain torrent – experiences from the Dorfbach torrent
Source: Copernicus journal article supplement (doi:10.5194/gh-70-265-2015), 2015-10-06
Supplement: Supplementary file 1 [file gh-70-265-2015-supplement.pdf]

Supplement of Geogr. Helv., 70, 265–279, 2015  
<http://www.geogr-helv.net/70/265/2015/>  
doi:10.5194/gh-70-265-2015-supplement  
© Author(s) 2015. CC Attribution 3.0 License.

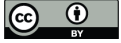

+ GEOGRAPHICA  
HELVETICA +

*Supplement of*

## **Methods for detecting channel bed surface changes in a mountain torrent – experiences from the Dorfbach torrent**

**C. Willi et al.**

*Correspondence to:* M. Keiler ([margreth.keiler@giub.unibe.ch](mailto:margreth.keiler@giub.unibe.ch))

The copyright of individual parts of the supplement might differ from the CC-BY 3.0 licence.

S 1 Guideline for choosing the appropriated method according to the aims of application and analysis

| <b>Research question:<br/>Methods to localise and quantify erosion and deposition in torrent channels</b> | <b>Requirements</b>                                             | <b>In-situ methods</b>                                                                                                                  | <b>Cross sections</b>                                                                                                                                               | <b>Terrain models</b>                                                                                                                                        | <b>Qualitative methods</b>                                                                                                                                     |                                                                                                                                         |                                                                                                                                              |
|-----------------------------------------------------------------------------------------------------------|-----------------------------------------------------------------|-----------------------------------------------------------------------------------------------------------------------------------------|---------------------------------------------------------------------------------------------------------------------------------------------------------------------|--------------------------------------------------------------------------------------------------------------------------------------------------------------|----------------------------------------------------------------------------------------------------------------------------------------------------------------|-----------------------------------------------------------------------------------------------------------------------------------------|----------------------------------------------------------------------------------------------------------------------------------------------|
|                                                                                                           |                                                                 | Erosion sensors<br>Berger et al. (2010; 2011a);<br>McArdell (2012, personale communication)<br>Fritschi (2012, personale communication) | TruPulse and dGPS<br>Own application                                                                                                                                | Terrestrial Laser Scanning<br>Own application                                                                                                                | LiDAR<br>Scheidl et al. (2008);<br>Scheidl (2012, personale communication)                                                                                     | Geomorphological mapping<br>Own application                                                                                             |                                                                                                                                              |
| <b>Location and process</b>                                                                               | <b>Process and process characteristics</b>                      | Channel changes caused by debris-flows: dimension and position of extensive structures should be measureable                            | <b>Time, duration and extent (max. Δz)</b> of erosion caused by debris-flows. Detection of deposition is not provided.                                              | <b>Extent (net Δz and ΔF)</b> of erosion and deposition caused by debris-flows in a certain cross section.                                                   | <b>Extent (net Δz and ΔV)</b> of erosion and deposition caused by debris-flows for a confined torrent area. Pattern are detectable.                            | <b>Extent (net Δz and ΔV)</b> of erosion and deposition caused by debris-flows for a confined torrent area. Pattern are detectable.     | <b>Tendencies of changes (Δz)</b> area-wide for the whole torrent channel. Pattern are detectable, no quantitative (only estimated) results. |
|                                                                                                           | <b>Channel properties and conditions</b>                        | 8-3 m wide channel with a channel bed consisting of coarse debris and levees up to 4 m high                                             | Application only in torrent channels with fine grained bed (d 90 < 0.3- 0.5 m) possible.                                                                            | Application difficult with steep or instable bank and missing slopes, measurement sites preferable outside the channel.                                      | Application difficult if banks are steep or unstable. High banks and narrow channels are also inappropriate. Measurement sites preferable outside the channel. | Application is hindered if the channel is strongly vegetated or hardly visible or if banks are steep. Inaccuracies and errors increase. | Application independent of the channel properties possible.                                                                                  |
|                                                                                                           | <b>Access to the torrent channel</b>                            | The torrent channel is accessible on hiking trails. The channel itself is walkable with mountaineering boots.                           | Punctual access to the channel by a roadway, accessibility of the channel necessary.                                                                                | Access to the channel by walkable banks is sufficient, accessibility of banks and channel necessary.                                                         | Access to the channel by a roadway or path, good accessibility of the channel necessary.                                                                       | No access to the torrent channel necessary.                                                                                             | Access to the channel by walkable banks is sufficient, accessibility of banks and channel necessary.                                         |
|                                                                                                           | <b>Application during/ after massive channel changes</b>        | Channel changes up to 10 m difference are realistic.                                                                                    | Sensors no more applicable after a major event; sensors would erode completely or would be massively covered - no data.                                             | Method not applicable anymore due to reduced view, eroded/ covered marks, unstable banks, missing accessibility to the channel.                              | Method may not be applicable anymore due to reduced view, missing GPS signal for georeferencing, missing accessibility to the channel.                         | Method applicable, reduced view and data accuracy with steepened channel and banks.                                                     | Method applicable, as long as the channel is accessible or at least visible, varieties in the amount of changes hardly differentiable.       |
| <b>Quality criteria</b>                                                                                   | <b>Scope of application</b> (investigation during only one day) | Continuous, extensive detection of the analysed channel section or entire channel as far as possible.                                   | <b>Point-based detection</b> in a small space inside the analysed channel section.                                                                                  | <b>Point-based cross sectional detection</b> spread over the entire channel (interpolation between single cross sections feasible).                          | <b>Confined area(s)</b> of the analysed channel section.                                                                                                       | <b>Total area</b> of the analysed channel section.                                                                                      | <b>Total area</b> of the analysed channel section.                                                                                           |
|                                                                                                           | <b>Accuracy of the raw data</b>                                 | 10 <sup>-2</sup> m-range up to m-range, depending on the intended use of the data.                                                      | 0.05 m resolution in correspondence to a single sensor element                                                                                                      | dGPS: horizontal and vertical precision +/- 0.1 m<br>TruPulse: Distance +/- 0.3 m<br>Inclination: +/- 0.25°<br>Azimuth: +/- 1° (LTI, 2009:52; Trimble, 2011) | Modelled surface: 0.002 m (Leica 2012)                                                                                                                         | Location: +/- 0.1 m<br>Height: +/- 0.5 m<br>(Standard accuracy according to Vosselman and Maas, 2010:21)                                | Location: multiple meters<br>Height: not observable<br>Mapping accuracy varies depending on the mapping base and scope for interpretation.   |
|                                                                                                           | <b>Accuracy of the final data</b>                               | 10 <sup>-1</sup> m-range up to m-range, depending on the intended use of the data.                                                      | 0.05 m resolution in correspondence to a single sensor element and inaccuracies in 10 <sup>-1</sup> m-range due to deposition on the sensor and measurement device. | Location: in the range of 0.5 m<br>Height: in the range of 0.5 m                                                                                             | Location: < 0.3 m<br>Height: in the range of 0.3 m                                                                                                             | Location: 0.3-0.5 m<br>Height: 0.1-0.3 m<br>(data for CH mountain torrents, also realistic in the Dorfbach torrent).                    | Location: multiple meters (strongly influenced by the interpretation of mapping person).<br>Height: Changes only detectable as tendencies.   |
|                                                                                                           | <b>Spatial resolution</b>                                       | 2-3 m or < 0.5 m, depending on the intended use of the data                                                                             | 5 measurements on 20 m <sup>2</sup> , remaining channel not covered                                                                                                 | Cross sectional resolution in 10 <sup>-2</sup> m-range<br>Distance between cross sections: 50-150 m                                                          | Enables 10 <sup>-1</sup> m-raster                                                                                                                              | Raster resolution 0.5-5 m (Oguchi et al. 2011)                                                                                          | In the range of 5-30 m, depending on the mapping base and scope for interpretation.                                                          |
|                                                                                                           | <b>Temporal resolution</b>                                      | Measurements during or after each event or at least once a month (to eliminate continuous changes).                                     | <b>Permanently installed and ready for measurements</b> , time limits of erosion during an event are exactly detectable.                                            | <b>Data collection few days up to max. one month before and after an event</b> , at any time possible if the channel is accessible.                          | <b>Data collection few days up to max. one month before and after an event</b> , at any time possible if the channel is accessible.                            | <b>Data collection few weeks up to several months before and after an event</b> , lack of temporal resolution due to financial reasons. | <b>Data collection few days up to max. one month before and after an event</b> , at any time possible if the channel is accessible.          |
|                                                                                                           | <b>Repeatability</b>                                            | Necessary                                                                                                                               | <b>Possible</b> , due to permanent installation.                                                                                                                    | <b>Possible</b> , as long as measurements sites are outside the torrent channel.                                                                             | <b>Possible</b> , fixed targets or georeferencing necessary.                                                                                                   | <b>Possible</b>                                                                                                                         | <b>Possible</b> , it should be noted that every mapping leaves scope for interpretation.                                                     |

|                               |                                                                                                                  |                                                                   |                                                                                                                                                                                                                                                                                                             |                                                                                                                                            |                                                                                                                                                      |                                                                                                                                                                                                                                            |                                                                              |
|-------------------------------|------------------------------------------------------------------------------------------------------------------|-------------------------------------------------------------------|-------------------------------------------------------------------------------------------------------------------------------------------------------------------------------------------------------------------------------------------------------------------------------------------------------------|--------------------------------------------------------------------------------------------------------------------------------------------|------------------------------------------------------------------------------------------------------------------------------------------------------|--------------------------------------------------------------------------------------------------------------------------------------------------------------------------------------------------------------------------------------------|------------------------------------------------------------------------------|
| <b>Organisational aspects</b> | <b>Suitability of the material for field investigations</b>                                                      | Material must be portable in difficult terrain.                   | Single use of an excavator necessary; durability of the sensors lowered in a humid channel bed.                                                                                                                                                                                                             | Measurement devices and tripod are handy and transportable by one person.                                                                  | Measurement device is heavy, multi-pieced and only transportable by multiple people.                                                                 | -                                                                                                                                                                                                                                          | Necessary material transportable without problems.                           |
|                               | <b>Total expenditure</b> (for preparation, data collection, processing and analysis to gain data from one event) | -                                                                 | <b>Approx. 13 person-days</b> , however decreasing with every further event (> 1 week for development and manufacturing).                                                                                                                                                                                   | <b>Approx. 8-9 person-days</b> caused by time-consuming data correction.                                                                   | <b>Approx. 14-15 person-days</b> mainly due to diverse work steps and data correction.                                                               | <b>9-10 person-days</b> if data collection and preparation is carried out by a professional company (Helimap 2011).                                                                                                                        | <b>Approx. 2-3 work-days</b> , expenditure depending on level of detail.     |
|                               | <b>Expenditure for field work</b> (for the collection of the data of one event)                                  | Maximum one day of field investigation for each measuring period. | <b>6 person-days</b> for installation (additional field work for detecting the height of sediment cover over the erosion sensors)                                                                                                                                                                           | <b>2 x 2 person-days</b> for 6-7 cross sections spread over 260 m altitude                                                                 | <b>2 x 3 person-days</b> for 2 areas of 70 m x 20 m with 5 scans each                                                                                | <b>No field work</b> necessary (only for plausibility check) (data collection <b>2 x 2 person-days</b> (Helimap 2011))                                                                                                                     | <b>2 x &lt; 1/2 person-day</b> for detailed mapping of studied channel reach |
|                               | <b>Post-processing expenditure</b> (for the processing of the data of one event)                                 | -                                                                 | <b>&lt; 30 minutes</b>                                                                                                                                                                                                                                                                                      | <b>Approx. 3-4 days</b> depending on the data quality.                                                                                     | <b>Approx. 5-7 days</b> , mainly due to manual data correction.                                                                                      | <b>2 days work</b> by a professional company for a 250 ha area (Helimap 2011)                                                                                                                                                              | <b>Approx. 1 day</b> , mainly for digitizing and dGPS data preparation.      |
|                               | <b>Assistant needs for the field investigation</b>                                                               | -                                                                 | <b>2 people</b> , including an excavator driver                                                                                                                                                                                                                                                             | <b>1 person</b>                                                                                                                            | <b>Minimum 2 people</b>                                                                                                                              | -                                                                                                                                                                                                                                          | <b>No need</b> , except for safety reasons.                                  |
|                               | <b>Further aspects</b>                                                                                           | -                                                                 | Distinctive <b>intervention</b> in the channel bed necessary to install the sensors.<br><br>Described sensor conforms to a top-end version and could be produced simpler and cheaper: as an alternative to the aluminium case a PVC case could be used.<br><br><b>Excavator</b> necessary, increases costs. | Accuracy of georeferencing depends on the <b>satellite availability</b> .<br><br><b>Atmospheric conditions</b> influence the measurements. | Lower resolution and quality requirements massively lower <b>work expenditure</b> .<br><br><b>Atmospheric conditions</b> influence the measurements. | LiDAR data collection expensive in comparison to other methods.<br><br>Data collection only if weather conditions are good, <b>atmospheric conditions</b> influence the measurements.<br><br><b>Helicopter</b> needed for data collection. | <b>Mapping base:</b> 1:5'000 to 1:25'000 maps.                               |
